# Supplementary material for: Time-Course Changes of Extracellular Matrix Encoding Genes Expression Level in the Spinal Cord Following Contusion Injury—A Data-Driven Approach
Source: PubMed Central journal article supplement (PMC7916102; doi:10.3390/ijms22041744), 2021-02-09
Supplement: ijms-22-01744-s001.pdf [file ijms-22-01744-s001.pdf]

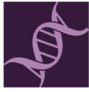

Supplementary Figure S1

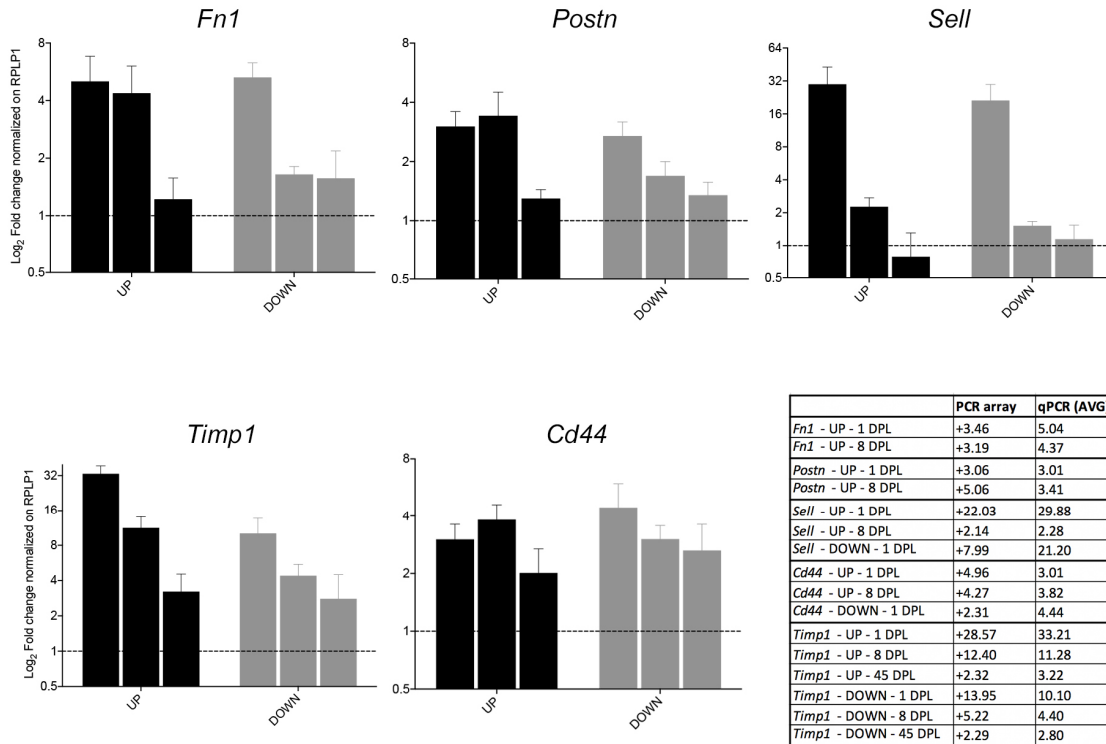

Supplementary Figure S2

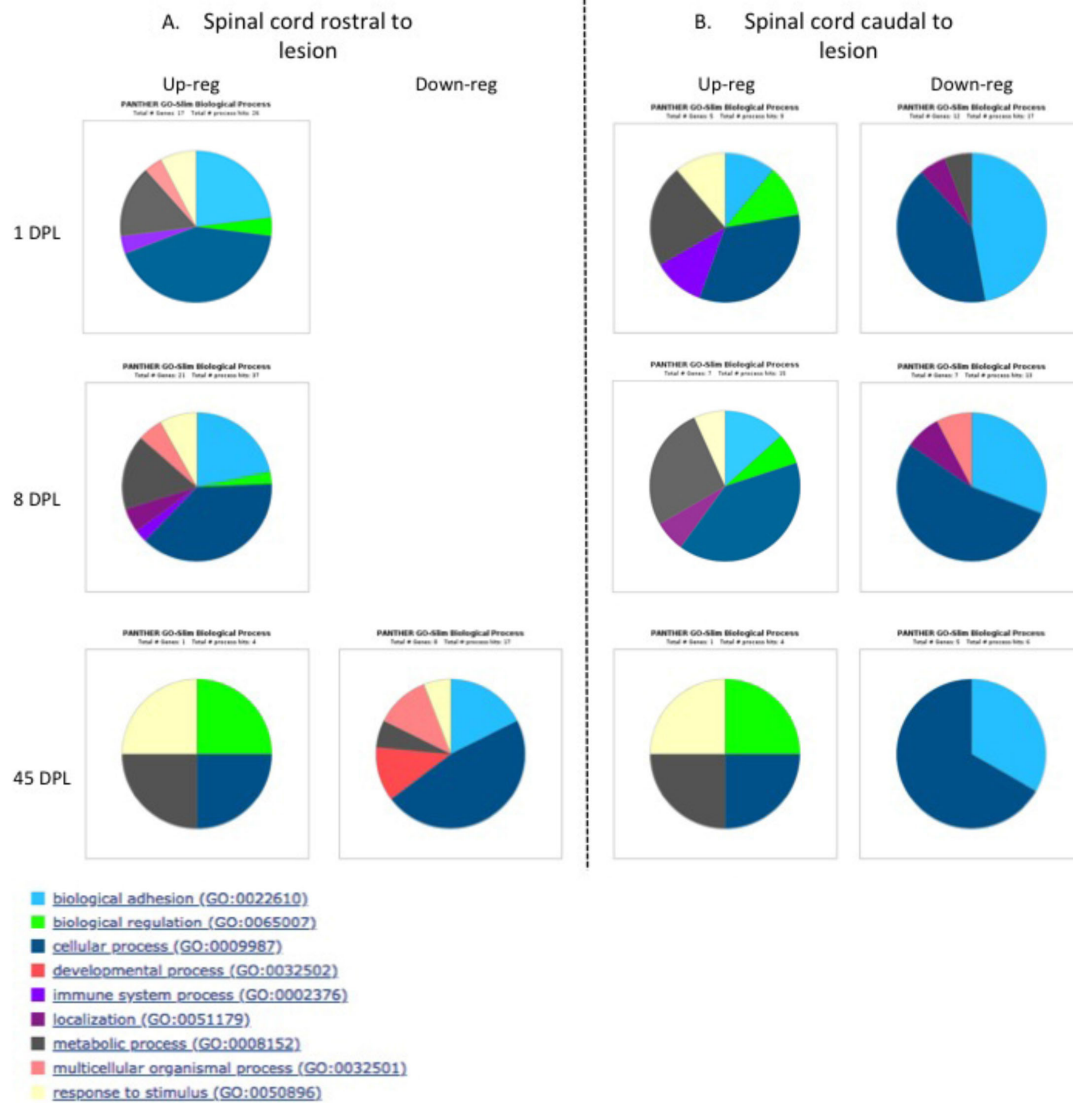

Supplementary Figure S3

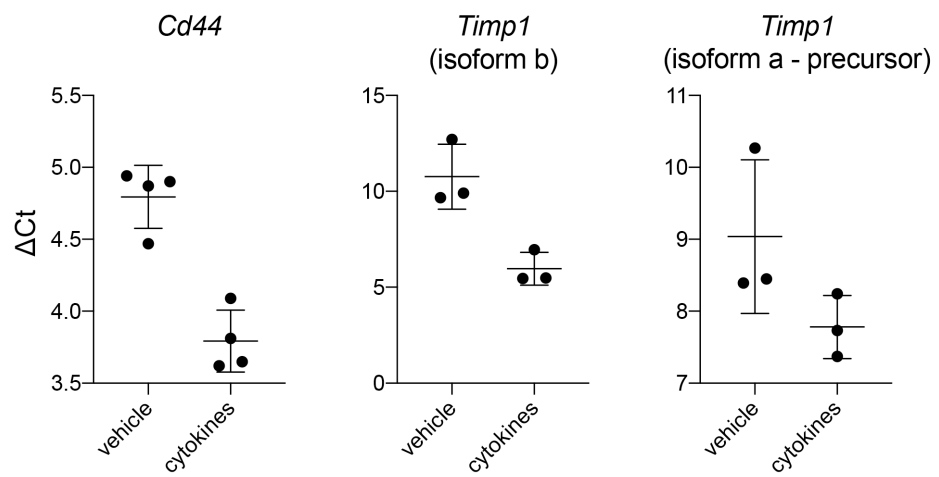

Supplementary Table S1

| Gene                   | Correlation $p$ value (Pearson $r$ ) |
|------------------------|--------------------------------------|
| <i>Cd44</i> (caudal)   | 0.7085                               |
| <i>Cd44</i> (rostral)  | 0.2032                               |
| <i>Fn1</i> (caudal)    | 0.8380                               |
| <i>Fn1</i> (rostral)   | 0.5819                               |
| <i>Postn</i> (caudal)  | 0.8852                               |
| <i>Postn</i> (rostral) | 0.8590                               |
| <i>Sell</i> (caudal)   | 0.7691                               |
| <i>Sell</i> (rostral)  | 0.5046                               |
| <i>Tnc</i> (caudal)    | 0.2912                               |
| <i>Tnc</i> (rostral)   | 0.5474                               |
| <i>Acan</i> (caudal)   | 0.5013                               |
| <i>Acan</i> (rostral)  | 0.9927                               |
| <i>Tnr</i> (caudal)    | 0.4781                               |
| <i>Tnr</i> (rostral)   | 0.8055                               |
| <i>Cspg4</i> (caudal)  | 0.7554                               |
| <i>Cspg4</i> (rostral) | 0.6695                               |
| <i>Slit1</i> (caudal)  | 0.6475                               |
| <i>Slit1</i> (rostral) | 0.6917                               |
| <i>Slit2</i> (caudal)  | 0.6471                               |
| <i>Slit2</i> (rostral) | 0.8710                               |
